# Supplementary material for: Cardiovascular Complications of Marijuana and Related Substances: A Review
Source: PubMed Central journal article supplement — Cardiol Ther. 2017 Dec 7;7(1):45–59. doi: 10.1007/s40119-017-0102-x (PMC5986667; doi:10.1007/s40119-017-0102-x), 2017-12-07
Supplement: 40119_2017_102_MOESM1_ESM.pdf [file 40119_2017_102_MOESM1_ESM.pdf]

### Supplementary Appendix 1. References Cited in Table 1 of the Manuscript

- S1. Dahdouh Z, Roule V, Lognoné T, Sabatier R, Grollier G. Cannabis and coronary thrombosis: what is the role of platelets? *Platelets*. 2012; 23: 243-245.
- S2. Hodcroft CJ, Rossiter MC, Buch AN. Cannabis-associated myocardial infarction in a young man with normal coronary arteries. *J Emerg Med*. 2014;47:277-281.
- S3. Velibey Y, Sahin S, Tanik O, Keskin M, Bolca O, Eren M. Acute myocardial infarction due to marijuana smoking in a young man: guilty should not be underestimated. *The American journal of emergency medicine*. 2015;33:1114-e1.
- S4. Biyik I, Akturk IF, Yalcin AA, Tanidir IC, Erturk M. Cannabis joint triggered recurrent anterior myocardial infarction in an adolescent taking dual anti-platelet therapy. *Postepy W Kardiologii Interwencyjnej*. 2012;8:156-159.
- S5. Mittleman MA, Lewis RA, Maclure M, Sherwood JB, Muller JE. Triggering myocardial infarction by marijuana. *Circulation*. 2001 Jun 12;103:2805-2809.
- S6. Jouanjus E, Leymarie F, Tubery M, et al. Cannabis-related hospitalizations: unexpected serious events identified through hospital databases. *Br J Clin Pharmacol*. 2011;71:758-765.
- S7. Franz CA, Frishman WH. Marijuana Use and Cardiovascular Disease. *Cardiol Rev*. 2016;24:158-62.
- S8. Shah M, Garg J, Patel B, Guthier J, Freudenberg RS. Can your heart handle the spice: A case of acute myocardial infarction and left ventricular apical thrombus. *Int J Cardiol*. 2016;215:129-131.
- S4. Mukamal KJ, Maclure M, Muller JE, Mittleman MA. An exploratory prospective study of marijuana use and mortality following acute myocardial infarction. *Am Heart J*. 2008;155:465-470.
- S10. Aronow WS, Cassidy J: Effect of marihuana and placebo- marihuana smoking on angina pectoris. *N Engl J Med*. 1974; 291:65-67.
- S11. Aronow WS, Cassidy J: Effect of smoking marihuana and of a high-nicotine cigarette on angina pectoris. *Clin Pharmacol Ther*. 1975;17:549-554.
- S12. Gottschalk LA, Aronow WS, Prakash R. Effect of marijuana and placebo-marijuana smoking on psychological state and on psycho- physiological cardiovascular functioning in anginal patients. *Biol Psychiatry* 1977;12:255-266
- S13. Casier I, Vanduyhoven P, Haine S, Vrints C, Jorens PG. Is recent cannabis use associated with acute coronary syndromes? An illustrative case series. *Acta Cardiol*. 2014;69:131-136.
- S14. Gunawardena MDVM, Rajapakse S, Herath J, Amarasena N. Myocardial infarction following cannabis induced coronary vasospasm. *BMJ Case Rep*. 2014;2014.

- S15. Basnet S, Mander G, Nicolas R. Coronary vasospasm in an adolescent resulting from marijuana use. *Pediatr Cardiol.* 2009;30:543-545.
- S16. Mir A, Obafemi A, Young A, Kane C. Myocardial infarction associated with use of the synthetic cannabinoid K2. *Pediatrics.* 2011;128:E1622-1627.
- S17. Atik SU, Dedeoglu R, Varol F, Cam H, Eroglu AG, Saltik L. Cardiovascular side effects related with use of “bonzai”: two case reports. *Turk Pediatri Arsivi-Turk Arch Pediatr.* 2015;50:61-64.
- S18. McKeever RG, Vearrier D, Jacobs D, LaSala G, Okaneku J, Greenberg MI. K2 -not the spice of life; synthetic cannabinoids and ST elevation myocardial infarction: a case report. *J Med Toxicol Off J Am Coll Med Toxicol.* 2015;11:129-131.
- S19. Safaa AM, Markham R, Jayasinghe R. Marijuana-induced recurrent acute coronary syndrome with normal coronary angiograms. *Drug Alcohol Rev.* 2012;31:91-94.
- S20. Karabulut A, Cakmak M. ST segment elevation myocardial infarction due to slow coronary flow occurring after cannabis consumption. *Kardiol Pol.* 2010;68:1266-1268.
- S21. Rezkalla SH, Sharma P, Kloner RA. Coronary no-flow and ventricular tachycardia associated with habitual marijuana use. *Ann Emerg Med.* 2003;42:365-369.
- S22. Jouanjus E, Raymond V, Lapeyre-Mestre M, Wolff V. What is the current knowledge about the cardiovascular risk for users of cannabis-based products? A systematic review. *Clinical Therapeutics.* 2017;39:e17.
- S23. Westover AN, McBride S, Haley RW. Stroke in young adults who abuse amphetamines or cocaine: a population-based study of hospitalized patients. *Arch Gen Psychiatry.* 2007;64:495-502.
- S24. Hemachandra D, McKetin R, Cherbuin N, Anstey KJ. Heavy cannabis users at elevated risk of stroke: evidence from a general population survey. *Aust N Z J Public Health.* 2016;40:226-230.
- S25. Rumalla K, Reddy AY, Mittal MK. Recreational marijuana use and acute ischemic stroke: a population-based analysis of hospitalized patients in the United States. *J Neurol Sci.* 2016;364:191-196.
- S26. Wolff V, Armspach JP, Lauer V, et al. Cannabis-related stroke: myth or reality? *Stroke.* 2013;44:558-563.
- S27. Phillips MC, Leyden JM, Chong WK, et al. Ischaemic stroke among young people aged 15 to 50 years in Adelaide, South Australia. *Med J Aust.* 2011;195:610-614.
- S28. de los Ri'os F, Kleindorfer DO, Khoury J, et al. Trends in substance abuse preceding stroke among young adults: a population based study. *Stroke.* 2012;43:3179-3183.
- S29. Singh NN, Pan Y, Muengtaweepansa S, Geller TJ, Cruz-Flores S. Cannabis-related stroke: case series and review of literature. *J Stroke Cerebrovasc Dis.* 2012;21:555-5560.

- S30. Finsterer J, Christian P, Wolfgang K. Occipital stroke shortly after cannabis consumption. *Clin Neurol Neurosurg.* 2004;106:305-308.
- S31. Santos AF, Rodriguez M, Mare´ R, Ferreira C, Soares-Fernandes J, Rocha J. Recurrent stroke in a young cannabis user. *J Neuropsych Clin Neurosci.* 2014;26:e41-e42.
- S32. Melki E, Denier C, The´audin-Saliou M, Sachet M, Ducreux D, Saliou G. External carotid artery branches involvement in reversible cerebral vasoconstriction syndrome. *J Neurol Sci.* 2012;313:46-47.
- S33. Mouzak A, Agathos P, Kerezoudi E, Mantas A, Vourdeli-Yiannakoura E. Transient ischemic attack in heavy cannabis smokers - how “safe” is it? *Eur Neurol* 2000;44:42-44.
- S34. Ducros A, Boukobza M, Porcher R, Sarov M, Valade D, Bousser MG. The clinical and radiological spectrum of reversible cerebral vasoconstriction syndrome. A prospective series of 67 patients. *Brain* 2007;130:3091-3101.
- S35. Wolff V, Lauer V, Rouyer O, Sellal F, Meyer N, Raul JS, et al. Cannabis use, ischemic stroke, and multifocal intracranial vasoconstriction a prospective study in 48 consecutive young patients. *Stroke.* 2011;42:1778-1780.
- S36. Takematsu M, Hoffman RS, Nelson LS, Schechter JM, Moran JH, Wiener SW. A case of acute cerebral ischemia following inhalation of a synthetic cannabinoid. *Clin Toxicol (Phila).* 2014;52:973-975.
- S37. Kaushik M, Alla VM, Madan R, Arouni AJ, Mohiuddin SM. Recurrent stress cardiomyopathy with variable regional involvement: insights into etiopathogenetic mechanisms. *Circulation.* 2011;124:e556-e557.
- S38. Singh A, Agrawal S, Fegley M, Manda Y, Nanda S, Shirani J. Marijuana (Cannabis) Use is an Independent Predictor of Stress Cardiomyopathy in Younger Men. *Circulation.* 2016;134:A14100.
- S39. Kalla A, Krishnamoorthy P, Gopalakrishnan A, Garg J, Figueredo V. Cannabis use predicts risks of heart failure and cerebrovascular accidents: results from the national inpatient sample. *J Am Coll Cardiol.* 2017;69:11(Suppl):1784.
- S40. Shah M, Garg J, Patel B, Guthier J, Freudenberger RS. Can your heart handle the spice: A case of acute myocardial infarction and left ventricular apical thrombus. *Int J cardiol.* 2016;215:129-131.
- S41. Elsheshtawy M, Sriganesh P, Virparia V, Patel F, Khanna A. Synthetic marijuana induced acute nonischemic left ventricular dysfunction. *Case Rep Cardiol.* 2016;2016:9625758.
- S42. Mondy KE, Gottdiener J, Overton ET, Henry K, Bush T, Conley L, et al. High prevalence of echocardiographic abnormalities among HIV-infected persons in the era of highly active antiretroviral therapy. *Clin Infect Dis.* 2011;52:378-386.

- S43. Menahem S. Cardiac asystole following cannabis (marijuana) usage -additional mechanism for sudden death? *Forensic Sci Int.* 2013;233:E3-E5.
- S44. Miller RH, Dhingra RC, Kanakis C, Amaty-Leon F, Rosen KM. The electrophysiological effects of delta-9-tetrahydrocannabinol (cannabis) on cardiac conduction in man. *Am Heart J* 1977;94:740-477.
- S45. Fernández- Fernández FJ, Caínzos-Romero T, Mesías Prego A, Sesma P. Ectopic atrial rhythm associated with cannabis use. *Minerva Cardioangiol* 2011;59:119-120.
- S46. Kosior DA, Filipiak KJ, Stolarz P, Opolski G: Paroxysmal atrial fibrillation in a young female patient following marijuana intoxication—a case report of possible association. *Med Sci Monit* 2000;6:386-389.
- S47. Singhm GK. Atrial fibrillation associated with marijuana use. *Pediatr Cardiol.* 2000;21:284.
- S48. Rezkalla SH, Sharma P, Kloner RA. Coronary no-flow and ventricular tachycardia associated with habitual marijuana use. *Ann Emerg Med.* 2003;42:365-369.
- S49. Lindsay AC, Foale RA, Warren O, Henry JA. Cannabis as a precipitant of cardiovascular emergencies. *Int J Cardiol* 2005;104:230-232.
- S50. Hartung B, Kaufenstein S, Ritz-Timme S, Daldrup T. Sudden unexpected death under acute influence of cannabis. *Forensic Sci Int.* 2014;237:e11-e13.
- S51. Baranchuk A, Johri AM, Simpson CS, Methot M, Redfearn DP. Ventricular fibrillation triggered by marijuana use in a patient with ischemic cardiomyopathy: a case report. *Cases J.* 2008;1:373.
- S52. Bachs L, Mørland H. Acute cardiovascular fatalities following cannabis use. *Forensic Sci Int* 2001;124:200-203.
- S53. Richard N, Arditti J, P!epin G, Mallaret M, Castot A. Box 2 - DRAMES (deaths related to drug and illegal substance abuse): an identification tool of drug related deaths in France. *Bull Epidemiol Hebd.* 2010;40-41:416.
- S54. Bucci F, Redler A, Fiengo L. Critical limb ischemia in a young man: saddle embolism or unusual presentation of thromboangiitis obliterans? *Case Rep Vasc Med.* 2013;2013:830540-0.
- S55. Broz P, Jaeger KA. Images in vascular medicine-Buerger's disease. *Vasc Med.* 2012;17:366-367.
- S56. Roberts JA, Meyer J-P. Buerger's disease presenting as a testicular mass: a rare presentation of an uncommon disease. *Urol Ann.* 2016;8:249-251.
- S57. Ibrir M, Ouadahi N, Hamzaoui N, Zemmour D, Ghita DH, Habouchi A, et al. Peripheral arteritis disease and ischemic strokes in cannabis use: a case report. *Thromb Res.* 2014;133:S115-S116.
- S58. Lee C, Moll S. Migratory superficial thrombophlebitis in a cannabis smoker. *Circulation.* 2014;130:214-215.

- S59. Lou JY, Randhawa MS, Hornacek D, Bajzer C. Spontaneous renal artery dissection in a cannabis user. *Vasc Med*. 2015;20:379-380.
- S60. Corvi F, Querques G, Lattanzio R, Preziosa C, ParodiMB, Bandello F. Central retinal vein occlusion in a young patients following cannabis smoke inhalation. *Eur J Ophthalmol*. 2014;24:437-440.
- S61. Steinberger EK, Ferencz C, Loffredo CA. Infants with single ventricle: a population-based epidemiological study. *Teratology* 2002; 65: 106–15.
- S62. Wilson PD, Loffredo CA, Correa-Villasenor A, Ferencz C: Attributable fraction for cardiac malformations. *Am J Epidemiol* 1998; 148:414-423.
- S63. Ewing CK, Loffredo CA, Beaty T : Paternal risk factors for isolated membranous ventricular septal defects. *Am J Med Genet* 1997;11:42-46.
- S64. Riederer AM, Campleman SL, Carlson RG, et al. Acute Poisonings from Synthetic Cannabinoids - 50 U.S. Toxicology Investigators Consortium Registry Sites, 2010–2015. *MMWR Morb Mortal Wkly Rep*. 2016;65:692-695.
- S36. Park B, McPartland JM, Glass M. Cannabis, cannabinoids and reproduction. *Prostaglandins Leukot Essent Fatty Acids* 2004; 70: 189-197.
